# Supplementary material for: Evolution of specifier proteins in glucosinolate-containing plants
Source: PubMed Central journal article supplement (PMC3482593; doi:10.1186/1471-2148-12-127), 2012-07-28
Supplement: 1471-2148-12-127-S1.pdf [file 1471-2148-12-127-S1.pdf]

**Tab. S1: Glucosinolate classes and hydrolysis product types in species of the Brassicales.** The plant organs indicated were analyzed for glucosinolates by HPLC after derivatization to desulfoglucosinolates. For the analysis of glucosinolate hydrolysis products, fresh plant material was homogenized in aqueous solution, and dichloromethane extracts of the homogenates were analyzed by GC-MS. Glucosinolates were assigned to structural classes according to the structure of their side chains as follows: **A1**, aliphatic: methylthio-/methylsulfinyl-; **A2**, aliphatic: terminal double bond; **A3**, aliphatic: terminal double bond and 2-hydroxy-group; **A4**, aliphatic: other than A1-A3; **B1**, benzyl-; **B2**, 4-hydroxybenzyl-; **B3**, 2-hydroxy-2-phenylethyl-; **B4**, Phe- and Tyr-derived other than B1-B3; **C**, indolic. Glucosinolate hydrolysis product types are abbreviated as follows: **I**, isothiocyanate; **N**, simple nitrile; **EN**, epithionitrile; **OX**, oxazolidine-2-thione; **T**, organic thiocyanate. An X indicates the identification of at least one representative of a glucosinolate class or a hydrolysis product type in the given plant material (n.i., not investigated). Most species were of the Brassicaceae. For species of other families, the family is given below the species name.

| Species                        | Organ     | Structural classes of glucosinolates |    |    |    |    |    |    |    |   | Types of glucosinolate hydrolysis products |      |      |    |      |
|--------------------------------|-----------|--------------------------------------|----|----|----|----|----|----|----|---|--------------------------------------------|------|------|----|------|
|                                |           | A1                                   | A2 | A3 | A4 | B1 | B2 | B3 | B4 | C | I                                          | N    | EN   | OX | T    |
| <i>Alliaria petiolata</i>      | seedlings |                                      | X  |    |    | X  |    |    |    | X | X                                          | X    | X    |    | X    |
| <i>Alyssum alpestre</i>        | leaves    | X                                    |    |    |    |    |    |    |    | X | X                                          | X    |      |    |      |
|                                | roots     | X                                    |    |    |    |    |    |    |    | X | X                                          |      |      |    |      |
|                                | seeds     | X                                    |    |    |    |    |    |    |    | X | X                                          |      |      |    |      |
| <i>Arabis glabra</i>           | leaves    | X                                    |    |    |    |    |    |    |    | X | X                                          |      |      |    |      |
|                                | roots     | X                                    |    |    |    |    |    |    |    | X |                                            |      |      |    |      |
|                                | seeds     | X                                    |    |    |    |    |    |    |    |   |                                            |      |      |    |      |
| <i>Barbarea intermedia</i>     | leaves    |                                      |    |    |    | X  |    |    |    | X |                                            |      |      | X  |      |
|                                | roots     |                                      |    |    |    |    |    | X  | X  | X | n.i.                                       | n.i. | n.i. | X  | n.i. |
|                                | seeds     |                                      |    |    |    |    |    | X  | X  | X | X                                          |      |      | X  | n.i. |
| <i>Barbarea stricta</i>        | leaves    |                                      |    |    |    |    | X  | X  | X  | X |                                            |      |      | X  |      |
|                                | roots     |                                      |    |    |    |    |    | X  | X  | X | X                                          |      |      | X  |      |
|                                | seeds     |                                      |    |    |    |    | X  | X  | X  | X | X                                          |      |      | X  |      |
| <i>Barbarea vulgaris</i>       | seeds     |                                      |    |    |    |    |    | X  | X  | X | X                                          |      |      | X  |      |
| <i>Camelina microcarpa</i>     | roots     | X                                    |    |    |    |    |    |    |    |   |                                            |      |      |    |      |
|                                | flowers   | X                                    |    |    |    |    |    |    |    |   |                                            |      |      |    |      |
|                                | siliques  | X                                    |    |    |    |    |    |    |    | X |                                            |      |      |    |      |
|                                | seeds     | X                                    |    |    |    |    |    |    |    |   |                                            |      |      |    |      |
| <i>Capsella bursa-pastoris</i> | roots     | X                                    |    |    |    |    |    |    |    |   |                                            |      |      |    |      |
|                                | flowers   |                                      | X  |    |    |    |    |    |    |   | X                                          |      |      |    |      |
|                                | seeds     | X                                    | X  |    |    |    |    |    |    |   |                                            |      |      |    |      |

Tab. S1, continued

| Species                                   | Organ       | A1   | A2   | A3   | A4   | B1   | B2   | B3   | B4   | C    | I    | N    | EN   | OX   | T    |
|-------------------------------------------|-------------|------|------|------|------|------|------|------|------|------|------|------|------|------|------|
| <i>Capsella rubella</i>                   | leaves      | X    |      |      |      |      |      |      |      |      |      |      |      |      |      |
|                                           | seedlings   | X    |      |      |      |      |      |      |      |      |      |      |      |      |      |
|                                           | flowers     |      |      |      |      |      |      |      |      |      | X    |      |      |      |      |
|                                           | seeds       | X    |      |      |      |      |      |      |      |      | n.i. | n.i. | n.i. | n.i. | n.i. |
| <i>Cardamine hirsuta</i>                  | leaves      | X    | X    |      |      | X    | X    |      | X    | X    | X    | X    | X    |      |      |
|                                           | roots       |      | X    |      |      | X    |      |      | X    | X    | X    | X    | X    |      |      |
|                                           | seeds       |      | X    |      |      | X    |      |      |      | X    | X    | X    | X    |      |      |
|                                           | siliques    |      | X    |      |      | X    |      |      |      | X    | X    | X    | X    |      |      |
| <i>Cardamine impatiens</i>                | leaves      |      | X    | X    |      | X    |      |      |      | X    |      | X    | X    |      |      |
|                                           | seeds       |      | X    | X    |      |      |      |      |      |      | X    |      | X    |      |      |
| <i>Cleome hassleriana</i><br>(Cleomaceae) | leaves      |      |      |      | X    | X    |      |      |      | X    | X    |      |      |      |      |
|                                           | roots       |      |      |      | X    |      |      |      |      | X    | X    |      |      |      |      |
|                                           | seeds       |      |      | X    | X    | X    |      |      |      |      | X    |      |      | X    |      |
| <i>Cleome spinosa</i><br>(Cleomaceae)     | leaves      |      |      |      | X    |      |      |      |      | X    |      |      |      |      |      |
|                                           | seeds       |      | X    |      | X    |      |      |      |      | X    | n.i. | n.i. | n.i. | n.i. | n.i. |
|                                           | flowers     |      |      |      | X    |      |      |      |      | X    | X    |      |      |      |      |
| <i>Diplotaxis muralis</i>                 | leaves      | X    | X    |      | X    |      | X    |      |      | X    | X    |      |      |      |      |
|                                           | seeds       | X    |      |      |      |      |      |      |      |      | X    | X    |      |      |      |
|                                           | flowers     | X    | X    |      | X    |      |      |      |      | X    | X    | X    |      |      |      |
|                                           | roots       | X    |      |      |      |      | X    |      |      | X    | X    | X    |      |      |      |
| <i>Draba aurea</i>                        | leaves      | X    | X    |      |      |      |      |      | X    | X    |      |      | X    |      |      |
|                                           | roots       | X    | X    |      |      |      |      |      |      | X    |      |      |      |      |      |
|                                           | seeds       | n.i. | n.i. | n.i. | n.i. | n.i. | n.i. | n.i. | n.i. | n.i. | X    |      | X    |      |      |
| <i>Draba lanceolata</i>                   | leaves      | X    | X    | X    |      |      |      |      |      |      |      |      | X    |      |      |
|                                           | roots       | X    | X    | X    |      |      |      |      |      |      |      |      |      |      |      |
|                                           | seeds       | n.i. | n.i. | n.i. | n.i. | n.i. | n.i. | n.i. | n.i. | n.i. | X    | X    | X    | X    |      |
| <i>Draba muralis</i>                      | leaves      |      |      |      |      |      |      |      | X    |      | X    | X    |      |      |      |
|                                           | roots       |      |      |      |      |      | X    |      | X    | X    | X    |      |      |      |      |
|                                           | seeds       |      |      |      |      |      | X    |      | X    | X    | X    |      |      |      |      |
| <i>Eruca sativa</i>                       | leaves      | X    | X    |      | X    |      |      |      |      | X    | X    |      |      |      |      |
|                                           | seedlings   | X    |      |      | X    |      |      |      |      |      | n.i. | n.i. | n.i. | n.i. | n.i. |
|                                           | seeds       | X    |      |      |      |      |      |      |      |      | X    |      |      |      |      |
|                                           | flowers     | X    |      |      |      |      |      |      |      |      | X    |      |      |      |      |
|                                           | siliques    | X    |      |      | X    |      |      |      |      |      | n.i. | n.i. | n.i. | n.i. | n.i. |
|                                           | flower buds | X    |      |      | X    |      |      |      |      |      | n.i. | n.i. | n.i. | n.i. | n.i. |
|                                           | roots       | n.i. | n.i. | n.i. | n.i. | n.i. | n.i. | n.i. | n.i. | n.i. | n.i. | X    |      |      |      |

Tab. S1, continued

| Species                                        | Organ                                 | A1                           | A2                     | A3                     | A4                           | B1                           | B2                           | B3                           | B4                           | C                      | I                | N              | EN        | OX          | T    |      |
|------------------------------------------------|---------------------------------------|------------------------------|------------------------|------------------------|------------------------------|------------------------------|------------------------------|------------------------------|------------------------------|------------------------|------------------|----------------|-----------|-------------|------|------|
| <i>Erysimum cheiri</i>                         | leaves<br>seeds<br>roots              | X<br>X<br>X                  |                        |                        | X                            |                              |                              |                              |                              | X<br>X<br>X            | X<br>X<br>X      |                |           |             |      |      |
| <i>Erysimum hieraciifolium</i>                 | leaves<br>seeds<br>roots              | X<br>X<br>X                  | X<br>X<br>X            |                        | X                            |                              |                              |                              |                              | X<br>X<br>X            | X<br>X<br>X      | X              |           |             |      |      |
| <i>Iberis amara</i>                            | leaves<br>seeds<br>flowers<br>roots   | X<br>X<br>n.i.<br>X          |                        | n.i.                   | n.i.                         | n.i.                         | n.i.                         | n.i.                         | n.i.                         | X<br>n.i.<br>X         | X<br>X<br>X<br>X | X              |           |             |      |      |
| <i>Isatis tinctoria</i>                        | leaves<br>seedlings<br>seeds<br>roots | n.i.<br>n.i.<br>n.i.<br>n.i. | n.i.<br>X<br>X<br>n.i. | n.i.<br>X<br>X<br>n.i. | n.i.<br>n.i.<br>n.i.<br>n.i. | n.i.<br>n.i.<br>n.i.<br>n.i. | n.i.<br>n.i.<br>n.i.<br>n.i. | n.i.<br>n.i.<br>n.i.<br>n.i. | n.i.<br>n.i.<br>n.i.<br>n.i. | n.i.<br>X<br>X<br>n.i. | n.i.             | X<br>n.i.<br>X | n.i.      | n.i.        | n.i. | n.i. |
| <i>Limnanthes douglasii</i><br>(Limnanthaceae) | leaves<br>seeds<br>roots              |                              |                        |                        |                              |                              |                              |                              | X<br>X<br>X                  | X                      | X<br>X<br>X      |                |           |             |      |      |
| <i>Moringa oleifera</i><br>(Moringaceae)       | leaves<br>seeds                       |                              | X                      |                        |                              | X                            | X<br>X                       |                              | X                            |                        | X<br>n.i.        | n.i.           | n.i.      | n.i.        | n.i. |      |
| <i>Reseda lutea</i><br>(Resedaceae)            | leaves<br>seeds<br>roots              |                              |                        |                        |                              | X<br>X<br>X                  | X<br>X                       |                              | X                            | X<br>X<br>X            |                  | X              |           |             |      |      |
| <i>Reseda luteola</i><br>(Resedaceae)          | leaves<br>seeds<br>roots              | n.i.                         | n.i.                   | n.i.                   | n.i.                         | n.i.                         | n.i.                         | X<br>n.i.<br>X               | X<br>n.i.<br>X               | X<br>n.i.<br>X         |                  | X              |           | X<br>X<br>X |      |      |
| <i>Schouwia purpurea</i>                       | leaves<br>seedlings                   | n.i.                         | n.i.<br>X              | n.i.<br>X              | n.i.<br>X                    | n.i.                         | n.i.                         | n.i.                         | n.i.                         | n.i.<br>X              |                  | X<br>X         | X<br>X    |             |      |      |
| <i>Tropaeolum minus</i><br>(Tropaeolaceae)     | leaves<br>seeds<br>flowers            | n.i.                         | n.i.                   | n.i.                   | n.i.                         | n.i.<br>X<br>X               | n.i.<br>X<br>X               | n.i.                         | n.i.<br>X                    | n.i.                   | X<br>n.i.<br>X   | X<br>n.i.<br>X | X<br>n.i. | n.i.        | n.i. | n.i. |
