# Supplementary material for: Evolution of specifier proteins in glucosinolate-containing plants
Source: PubMed Central journal article supplement (PMC3482593; doi:10.1186/1471-2148-12-127), 2012-07-28
Supplement: 1471-2148-12-127-S2.pdf [file 1471-2148-12-127-S2.pdf]

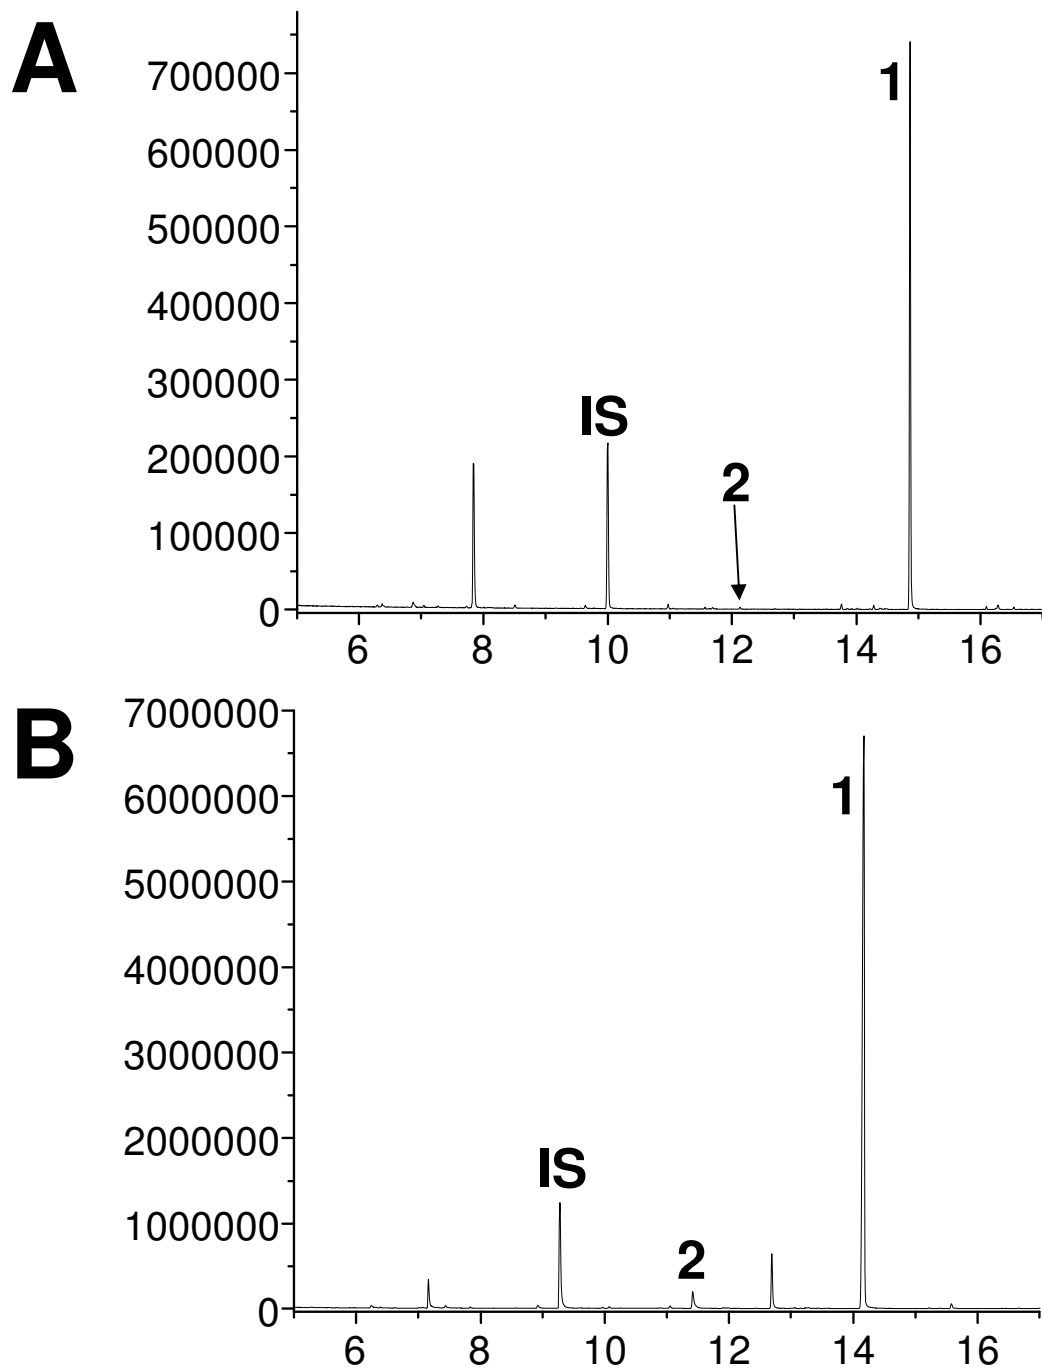

**Fig. S1: Glucosinolate hydrolysis products in *Tropaeolum minus*.** Fresh leaves (**A**) or flowers (**B**) were homogenized in aqueous buffer, and dichloromethane extracts of the homogenates were analyzed by GC-MS. Representative chromatograms (total ion current) are shown. **1**, benzylisothiocyanate; **2**, phenylacetonitrile; **IS**, internal standard (phenylcyanide). Chromatograms in A and B were recorded with three years difference explaining the changed retention times.
