# Supplementary material for: Evolution of specifier proteins in glucosinolate-containing plants
Source: PubMed Central journal article supplement (PMC3482593; doi:10.1186/1471-2148-12-127), 2012-07-28
Supplement: 1471-2148-12-127-S3.pdf [file 1471-2148-12-127-S3.pdf]

|        |     |                                                                |
|--------|-----|----------------------------------------------------------------|
| AtNSP1 | 1   | MAQKLEAKGGEMGDVWDDGVYENVRKVVYVGOAQYGIAFVKFEYVNGSQVVVGEHGKKT    |
| AtNSP2 | 1   | MVQKVEARGGEIGDVWDDGAYDGVVRKVVYVGOEDGIAFVKFEYVNGSQEVVGD         |
| BoESP  | 1   | -----                                                          |
| AtESP  | 1   | -----                                                          |
| LsTFP  | 1   | -----                                                          |
| AtNSP5 | 1   | -----                                                          |
|        |     |                                                                |
| AtNSP1 | 61  | LGVEEFEIDADDYIVYVEGYREKVNDMTS--EMITFLSIKTFKGKTSHPIEKRP         |
| AtNSP2 | 61  | LGAEFEVDPDDYIVYVEGYHEKVFVTTKEIISTLTFKTYKGTSPPFGI               |
| BoESP  | 1   | -----                                                          |
| AtESP  | 1   | -----                                                          |
| LsTFP  | 1   | -----                                                          |
| AtNSP5 | 1   | -----                                                          |
|        |     |                                                                |
| AtNSP1 | 120 | GGKIVGFHGRSTDVHLHSLGAYVSLSSITKILCRWIKVEQKCEGPGLRCSHGIAOVGNKI   |
| AtNSP2 | 121 | GGKIVGFHGRSTDVHLHSLGAYISSPATPKIRCKWIKVEQKCEGPGPRCSHDIAOVGNKI   |
| BoESP  | 1   | -----MAPSVOGEWIKVEQKGGQTPCPRSSHGIAVVGDKL                       |
| AtESP  | 1   | -----MAPTVOGEWIKVQKGGTGPGRSSHGIAVVGDKL                         |
| LsTFP  | 1   | -----MALTVOGEWIKVEQKGGPAPGRSSHGIAVVGDKL                        |
| AtNSP5 | 1   | -----MCPVENKWLKVEQKCEGPGARSSHAMTVVGNKV                         |
|        |     |                                                                |
| AtNSP1 | 179 | YSEGGELTPNQPIDKHLVYFDLETRTWSISPATGDPVPHLSCLGVRMVSIGSSTLYIFGGRD |
| AtNSP2 | 180 | YSEGGELTPNQPIDKHLVYFDLETRTWSISPATGDPVPHLSCLGVRMVSIGSSTLYIFGGRD |
| BoESP  | 36  | YSEGGELTPNISIDKDLVYFDLETRTWSISPSKGVAPDVKALGTRMVSIGTKLYIFGGRD   |
| AtESP  | 36  | YSEGGELTPNKHIDKDLVYFDLETRTWSIAQPKGDAPTVSCLGVRMVAVGTKLYIFGGRD   |
| LsTFP  | 36  | YMEGGELTPQFHLIDKHLVYFDLETRTWSIAEPKGEAPSLSCLGVRMVAVGTKLYIFGGRD  |
| AtNSP5 | 34  | YCFGGELKPTIHLIDNDLVYFDLETRQEWISAPATGEAPFPQFVSMVTIGSSTLYIFGGRD  |
|        |     |                                                                |
| AtNSP1 | 239 | ASRQYNGFYSEDTTNEWKLLTPVEE--GPTPRSFHSMADENNVYVFGGVS-----AT      |
| AtNSP2 | 240 | ASRKYNGFYSEDTTNEWKLLTPVEQ--GPTPRSFHSMADENNVYVFGGVS-----AT      |
| BoESP  | 96  | ENKFDDEYSDTIVTNEWTKLTLIDQEGGEARTYHSMASDENNVYVFGGVS             |
| AtESP  | 96  | ENRNFENERSMDTIVTSEWTEFLKLDDEVGGEARTYHSMASDENNVYVFGGVS          |
| LsTFP  | 96  | ENRNYSDFYSDTIVKKEWKFLLKLDDEERVPEARSFPAAIADENHYVIFGGVS          |
| AtNSP5 | 93  | DKRRYNGLHSDTETNEWKLLAPVEE--GLPGRSYHSMAGDRRVYVFGGV-----AK       |
|        |     |                                                                |
| AtNSP1 | 291 | ARLNTLDSYNIIVDKKWFHCSTPGD---SLTARGGAGLEVVGKLVVVVY-----GFN      |
| AtNSP2 | 292 | VRLKTLDAYNIIVDHKWVQCSTPGG---SCSVRGGAGLEVVGKLVVVVY-----GFN      |
| BoESP  | 156 | BRFRTEAAYNIADGKWSQLPDPEGEQFPRFERRGGAGFVVVGKLVVVVYGFATS         |
| AtESP  | 156 | TRFRTEAAYNIADGKWAQLPDPEGD---NFEKRGGAGFAVVVGKLVVVVYGFATS        |
| LsTFP  | 156 | ERFKSTIVYNIADGTWSQLPNPGP---DFEPRGGAGLAVTDKLVVVVCGFANS          |
| AtNSP5 | 145 | GRVNTLHAMDVVDCKWVEYPAAGE---ACKGRGAPGLVVVEGRIVVLF-----GFD       |
|        |     |                                                                |
| AtNSP1 | 339 | GCEVDDVHYDYPVQDKWTOVEYFGVRPSESRVFAAIAIGKHLVIFGGEIAMDP          |
| AtNSP2 | 340 | GCEVDDVHCYDPAQDKWTOVEYFGGKPCARSVFAAIAVVGKHLVIFGGEIAMDP         |
| BoESP  | 216 | DYESDQVQFYDPATQKWTEVEYTKGDKPSARSVEGHAVVGKYLIFGGEETWPD          |
| AtESP  | 213 | DYESNAVQFYDPASKKWTEVEYTGAKPSARSVFAAIAVVGKYLIFGAGEVWP           |
| LsTFP  | 212 | DYNSNKVQYDYLVSQKWIYVKTSGVKPSGRSVFAAIAVIGKQIVYIFGGEIFR          |
| AtNSP5 | 193 | GNELGDIHCTDLASEQKAVEYTGDPVPAARSVEPAVSYGKYLIVYFGEIEPHE          |
|        |     |                                                                |
| AtNSP1 | 399 | QITDGTALDTEITLWERTDKFEGEEETPSSRGWTASTTATIDCKKGLVMHGG           |
| AtNSP2 | 400 | QISGGTALDTEITLWEEKLIDKLGEEETPSIRGWSASTTGTIDCKKGLVMHGG          |
| BoESP  | 276 | TLSDDEGALDTEITLVWERFEGG--GAEPGQ---LGNPCYTTATVYCKKGLVMHGG       |
| AtESP  | 273 | TLSDNEGALDTEITLVWEKLGEEGAPAIPT---RGWTAYTAATVDCNGLVMHGG         |
| LsTFP  | 272 | TLSDNEGALDTEITLVWEKLVDCGEPMPPT---LGNWTANCTGTVYCKTGLVMHGG       |
| AtNSP5 | 253 | KVSGEVQLDTEITLVWERIVCGNEEEKP--SQRGWCAFTKAVKDCGEGLLVHGG         |
|        |     |                                                                |
| AtNSP1 | 459 | FDDLFFYGIDSA---                                                |
| AtNSP2 | 460 | FGDLFFYGVDSA---                                                |
| BoESP  | 332 | TDELYFYAVNSA---                                                |
| AtESP  | 330 | TDDLFFYAVNSA---                                                |
| LsTFP  | 329 | TDDFFYFSF-----                                                 |
| AtNSP5 | 312 | IDDLVFWGFSHLNVN                                                |

**Fig. S2: Alignment of previously known specifier proteins for primer design.** Protein names are as given in Tab. 1. Amino acid sequences were aligned with the ClustalW option implemented in MEGA 5.05 [49]. White letters on black background indicate amino acid residues that are identical in at least 80 % of the sequences, white letters on gray background indicate amino acid residues that are similar in at least 80 % of the sequences. In case of AtNSP1 and AtNSP2, partial amino acid sequences starting with amino acid 120 and 121, respectively, are shown. For all other proteins, full-length amino acid sequences are included. Green boxes indicate regions of high amino acid identity that were used to design degenerate primers P1, P2, P5, and P6 (Table S2).
