# Supplementary material for: Evolution of specifier proteins in glucosinolate-containing plants
Source: PubMed Central journal article supplement (PMC3482593; doi:10.1186/1471-2148-12-127), 2012-07-28
Supplement: 1471-2148-12-127-S4.pdf [file 1471-2148-12-127-S4.pdf]

**Tab. S2: Oligonucleotide primers for cDNA isolation.** Sequences are given starting with the 5' end. Mixed nucleotide codes are: D, A+G+T; K, G+T; M, A+C; R, A+G; S, C+G; W, A+T; Y, C+T. Protein names are as given Table 1.

| Species /protein | Purpose         | Name | Nucleotide sequence                            |
|------------------|-----------------|------|------------------------------------------------|
| all              | degenerate      | P1   | TCG ACA AAS ACC TYT ACG TCT TTG ACT TCA A      |
| all              | degenerate      | P2   | TCC CAC ACC ART GTC TCR GTG TCC AA             |
| all              | degenerate      | P5   | TCT ATD YCT WYG GWG GCC GDG AC                 |
| all              | degenerate      | P6   | TCA TTG STY KGM GMD TTM CCR CCA                |
| all              | oligo(dT)anchor | P7   | GGC CAC GCG TCG ACT AGT ACT TTT TTT TTT TTT TT |
| ApTFP1           | 3'RACE          | P54  | ATC CTA ATA TAC CAA CAC TC                     |
| ApTFP1           | 3'RACE/nested   | P53  | GCA CAT CAA GGC CCG GGG ACC                    |
| ApTFP1           | 5'RACE          | P51  | TCG GGT CCT CCC TCT TCA TC                     |
| ApTFP1           | 5'RACE/nested   | P50  | CCC TTG GCC GGA GCG ATT GAC C                  |
| ChESP1           | 3'RACE          | P12  | CCC GGG ACG TTG AAC AAT GAG GG                 |
| ChESP1           | 3'RACE/nested   | P11  | GAG GGT TAT GTG TTG GAC AC                     |
| ChESP1           | 5'RACE          | P10  | GGG GCT TCT CCG TTG GCC GGA GCG                |
| ChESP1           | 5'RACE/nested   | P9   | CCA AGT CTG AGT GTT GAA GTC                    |
| ChESP1           | ORF             | P13  | GGC TTA AUA TGG CTC CAA CTT TTC AAG GCG        |
| ChESP1           | ORF             | P14  | GGT TTA AUT TAA GCT GAG TTA ACA GCG T          |
| ChNSP1           | 3'RACE          | P20  | GGG ATC ATT GAT GGT AAG AAA GGG C              |
| ChNSP1           | 3'RACE/nested   | P19  | GGG CTT GTG ATG CAT GGC GG                     |
| ChNSP1           | 5'RACE          | P25  | GCC GTT CCG TAC CAC CCA CTC C                  |
| ChNSP1           | 5'RACE/nested   | P18  | GTC GTG TCA AAC GAG TAG AAG CCG                |
| ChNSP1           | ORF             | P28  | GGC TTA AUA TGG CCC AAA AGC TGG AAG            |
| ChNSP1           | ORF             | P29  | GGT TTA AUC TAA TGG ATT CCA TAA AAG AAG        |
| CiESP1           | 3'RACE          | P76  | GCG TGT TTG CGC ATG CCG TAG                    |
| CiESP1           | 3'RACE/nested   | P12  | CCC GGG ACG TTG AAC AAT GAG GG                 |
| CiESP1           | 5'RACE          | P75  | GGT CCT CCC GCC TCA TCG                        |
| CiESP1           | 5'RACE/nested   | P74  | GAG TAA AAG TCG CAG AAG TGG C                  |
| CiESP1           | ORF             | P13  | GGC TTA AUA TGG CTC CAA CTT TTC AAG GCG        |
| CiESP1           | ORF             | P14  | GGT TTA AUT TAA GCT GAG TTA ACA GCG T          |
| DaESP1           | 3'RACE          | P68  | CCC GGC TTC TGG AAA ATG GAC                    |
| DaESP1           | 3'RACE/nested   | P67  | CGA AGC CAG ACC CAA ATG CCC                    |
| DaESP1           | 5'RACE          | P66  | CGA GTA AAA GTC TTC GAA GTC C                  |
| DaESP1           | 5'RACE/nested   | P65  | CGG CCT CCA AAG ATA TAG AGC                    |
| DaESP1           | ORF             | P69  | GGC TTA AUA TGG CTC CGA GTT TAC AAG G          |
| DaESP1           | ORF             | P70  | GGT TTA AUT TAC GCG GAA TTG ACT GCA TAG AAG    |
| DIESP1           | 3'RACE          | P68  | CCC GGC TTC TGG AAA ATG GAC                    |
| DIESP1           | 3'RACE/nested   | P67  | CGA AGC CAG ACC CAA ATG CCC                    |
| DIESP1           | 5'RACE          | P66  | CGA GTA AAA GTC TTC GAA GTC C                  |
| DIESP1           | 5'RACE/nested   | P65  | CGG CCT CCA AAG ATA TAG AGC                    |
| DIESP1           | ORF             | P69  | GGC TTA AUA TGG CTC CGA GTT TAC AAG G          |
| DIESP1           | ORF             | P70  | GGT TTA AUT TAC GCG GAA TTG ACT GCA TAG AAG    |
| ItESP1           | 3'RACE          | P128 | CGT GTT CGC GCA TGC CGT TGT AGG                |
| ItESP1           | 3'RACE/nested   | P127 | GGA GGT GAA ACA TGG CCG GAT CC                 |
| ItESP1           | 5'RACE          | P114 | GCG GCC TCC GAA GAG ATA GAG C                  |
| ItESP1           | 5'RACE          | P115 | CGA ACG AGT AAA ACT CGT CG                     |
| ItESP1           | ORF             | P130 | GGC TTA AUA TGG CTC CGA GTG TGC AAG GC         |
| ItESP1           | ORF             | P131 | GGT TTA AUT TAC GCG GAA TTG ACT GCA TAG        |
| ItNSP1           | 3'RACE          | P142 | GGA CAC AAG TGG AAA CAT ATG G                  |
| ItNSP1           | 3'RACE/nested   | P141 | GCC TTG TGC TAG GAG CGT TTT CG                 |
| ItNSP1           | 5'RACE          | P145 | GGT GGG AAG CGT CTC TGC CTA C                  |
| ItNSP1           | 5'RACE/nested   | P144 | CCA ACT GAG ACC ATA CGA ACA C                  |
| ItNSP1           | ORF             | P149 | GGC TTA AUA TGG CCA AAA AGC TGG AAG CAA AGG    |
| ItNSP1           | ORF             | P150 | GGT TTA AUT TAA GCA GAG TCA ATC CCG            |
| SpESP1           | 3'RACE          | P115 | CGA ACG AGT AAA ACT CGT CG                     |
| SpESP1           | 3'RACE/nested   | P114 | GCG GCC TCC GAA GAG ATA GAG C                  |

|        |               |      |                                         |
|--------|---------------|------|-----------------------------------------|
| SpESP1 | 5'RACE        | P112 | GAT CTG GCC GGA CCC AAA CGG TC          |
| SpESP1 | 5'RACE/nested | P111 | CGG TCC AGG GAC GTT GAC C               |
| SpESP1 | ORF           | P118 | GGC TTA AUA TGG CTT CGA CAT TGC AAG GC  |
| SpESP1 | ORF           | P119 | GGT TTA AUT TAC GCA GAA TTG ACA GCG TAG |
| SpNSP1 | 3'RACE        | P99  | GCC AGG AGT GTT TTC GCT AGT GC          |
| SpNSP1 | 3'RACE/nested | P98  | GGT AAA CAC ATT GTG ATA TTT GG          |
| SpNSP1 | 5'RACE        | P96  | CTT GAA GCG TCA CGG CCT CC              |
| SpNSP1 | 5'RACE/nested | P95  | CCA ATA GAC ACC ATG CGG ACG C           |
| SpNSP1 | ORF           | P102 | GGC TTA AUA TGG CCC AAA AGC TGG AAG C   |
| SpNSP1 | ORF           | P103 | GGT TTA AUT TAA GCA GAT TCA ATC CCA TAA |
