# Supplementary material for: Evolution of specifier proteins in glucosinolate-containing plants
Source: PubMed Central journal article supplement (PMC3482593; doi:10.1186/1471-2148-12-127), 2012-07-28
Supplement: 1471-2148-12-127-S5.pdf [file 1471-2148-12-127-S5.pdf]

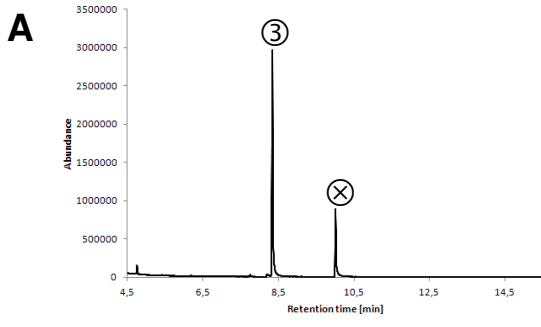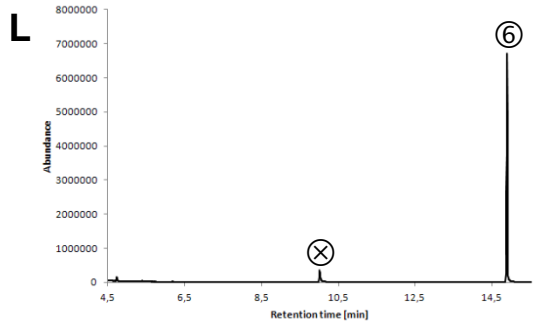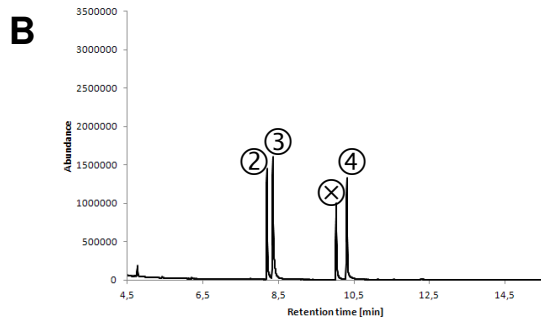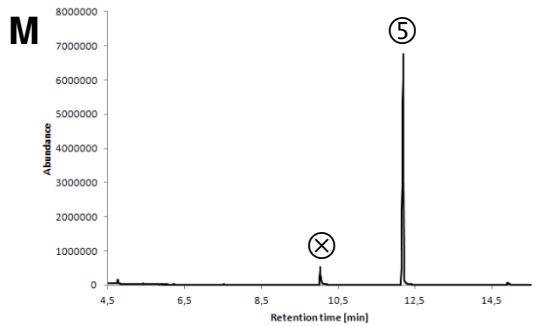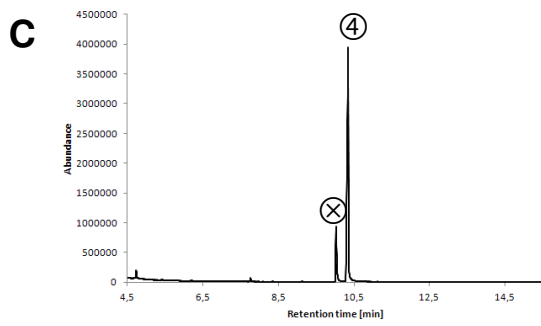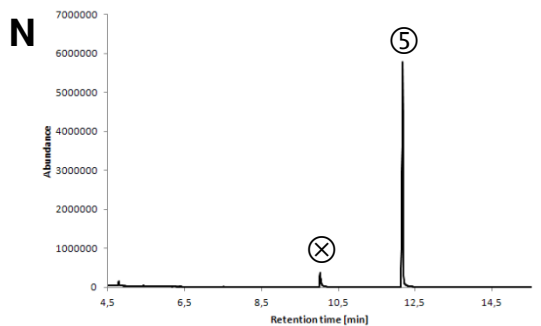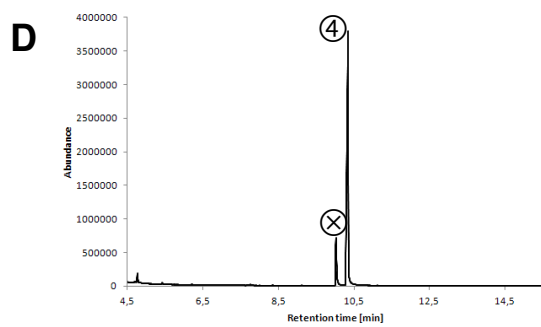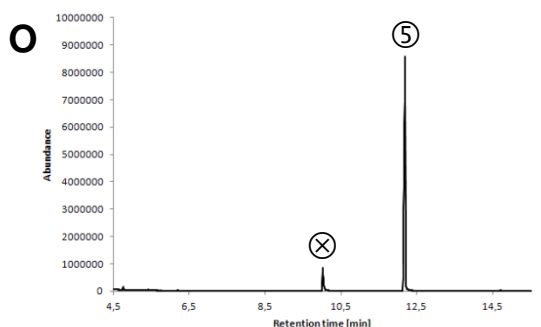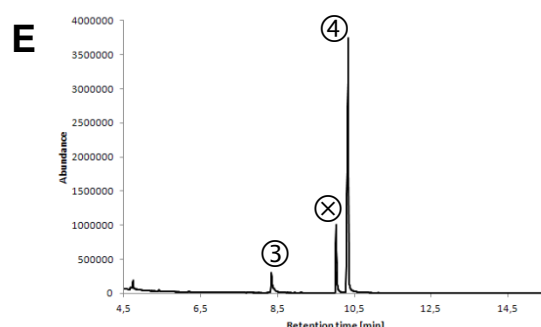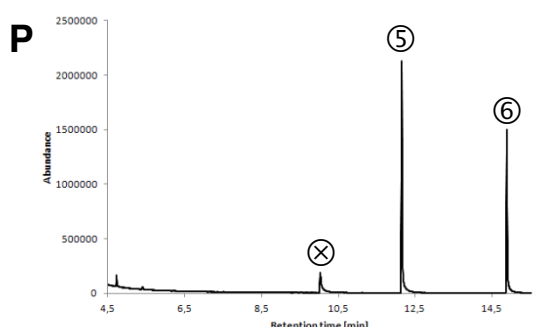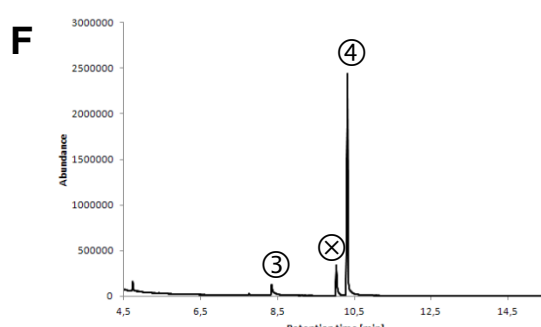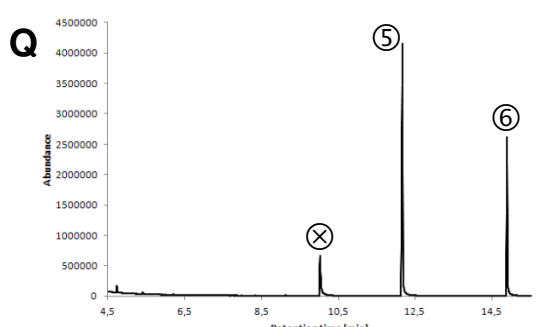

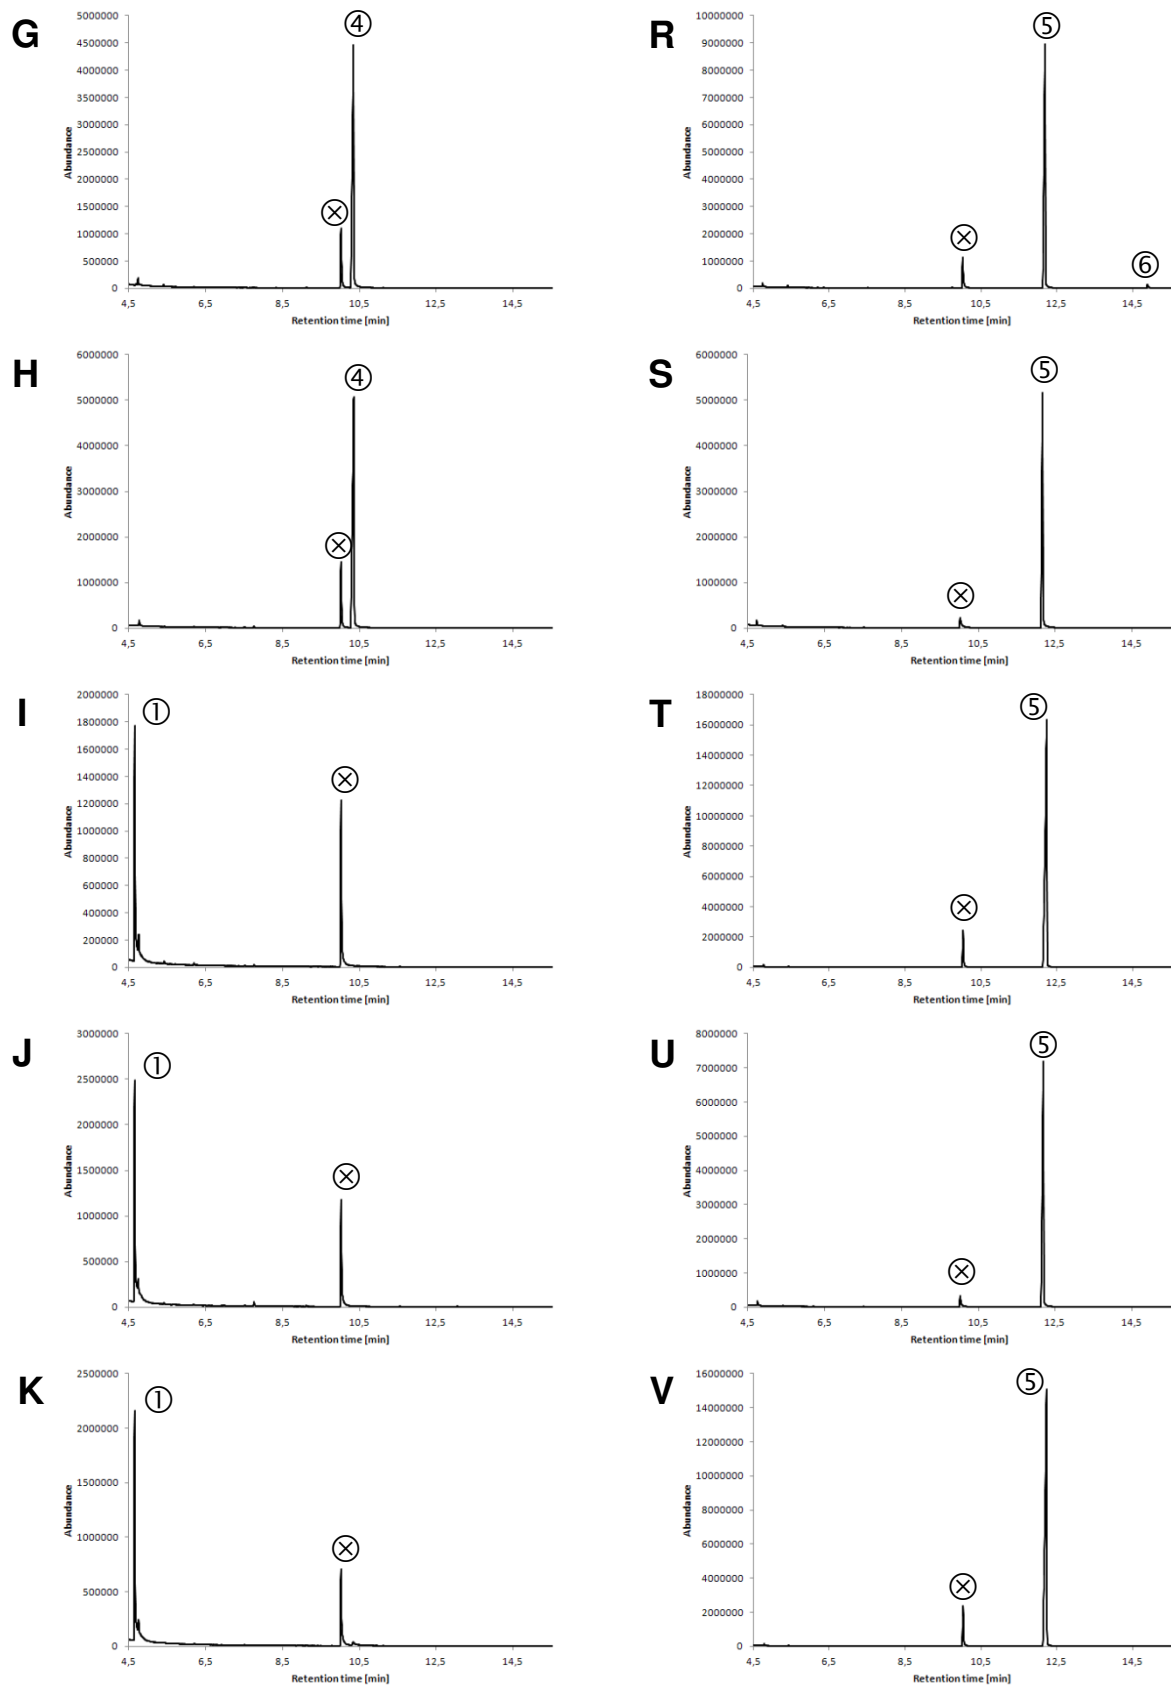

**Fig. S3: Assignment of newly identified specifier proteins to the ESP, TFP or NSP type.** Activity was tested using crude extracts of bacteria expressing specifier protein cDNAs, 1 mM allylglucosinolate (**A-K**) or 2 mM benzylglucosinolate (**L-V**) and 0.005 units myrosinase in 50 mM MES buffer, pH 6.0. Shown are total ion current traces of GC-MS chromatograms recorded of dichloromethane extracts of the assay mixtures after 30 min incubation. Products of allylglucosinolate breakdown are simple nitrile (1), organic thiocyanate (2), isothiocyanate (3), and epithionitrile (4). Products of benzylglucosinolate are simple nitrile (5), and isothiocyanate (6). (X) indicates the peak of the internal standard. The following cDNAs were used: **A, L**, no cDNA (empty vector control); **B, M**, *ApTFP*; **C, N**, *ChESP*; **D, O**, *CiESP*; **E, P**, *DaESP*; **F, Q**, *DIESP*; **G, R**, *ItESP*; **H, S**, *SpESP*; **I, T**, *ChNSP*; **J, U**, *ItNSP*; **K, V**, *SpNSP*.
