# Supplementary material for: Evolution of specifier proteins in glucosinolate-containing plants
Source: PubMed Central journal article supplement (PMC3482593; doi:10.1186/1471-2148-12-127), 2012-07-28
Supplement: 1471-2148-12-127-S6.pdf [file 1471-2148-12-127-S6.pdf]

**Tab. S3: Amino acid and nucleotide sequence identities of specifier proteins/ specifier protein cDNAs.** Amino acid sequence identities are shown on the right, nucleotide sequence identities on the left as determined in separate comparisons of each sequence pair by ClustalW implemented in MEGA Vers. 5.05.

|                                             | Lepidium sativum (Lepidieae) LsTFP | Alliaria petiolata (Thlaspidaceae) TFP1 | Thlaspi arvense (Thlaspidaceae) TaTFP | Draba aurea (Arabideae) ESP1 | Draba lanceolata (Arabideae) ESP1 | Brassica oleracea (Brassicaceae) ESP | Brassica rapa (Brassicaceae) FJ374638 | Schouwia purpurea (Brassicaceae) ESP1 | Arabidopsis lyrata (Camelineae) XM002884120 | Arabidopsis thaliana (Camelineae) AtESP | Cardamine hirsuta (Cardamineae) ESP1 | Cardamine impatiens (Cardamineae) ESP1 | Isatis tinctoria (Isatideae) ESP1 | Schouwia purpurea (Brassicaceae) NSP1 | Arabidopsis thaliana (Camelineae) AtNSP1 | Arabidopsis thaliana (Camelineae) AtNSP2 | Arabidopsis thaliana (Camelineae) AtNSP3 | Arabidopsis thaliana (Camelineae) AtNSP4 | Arabidopsis thaliana (Camelineae) AtNSP5 | Arabidopsis thaliana (Camelineae) At3g07720 | Cardamine hirsuta (Cardamineae) NSP1 | Eutrema halophilum (Eutremeae) AK353179 | Isatis tinctoria (Isatideae) NSP1 |
|---------------------------------------------|------------------------------------|-----------------------------------------|---------------------------------------|------------------------------|-----------------------------------|--------------------------------------|---------------------------------------|---------------------------------------|---------------------------------------------|-----------------------------------------|--------------------------------------|----------------------------------------|-----------------------------------|---------------------------------------|------------------------------------------|------------------------------------------|------------------------------------------|------------------------------------------|------------------------------------------|---------------------------------------------|--------------------------------------|-----------------------------------------|-----------------------------------|
| Lepidium sativum (Lepidieae) LsTFP          |                                    | 60                                      | 59                                    | 67                           | 67                                | 63                                   | 64                                    | 65                                    | 67                                          | 68                                      | 65                                   | 64                                     | 63                                | 51                                    | 51                                       | 49                                       | 51                                       | 48                                       | 46                                       | 44                                          | 49                                   | 45                                      | 48                                |
| Alliaria petiolata (Thlaspidaceae) TFP1     | 73                                 |                                         | 93                                    | 74                           | 73                                | 75                                   | 75                                    | 76                                    | 72                                          | 72                                      | 68                                   | 67                                     | 76                                | 53                                    | 53                                       | 54                                       | 52                                       | 50                                       | 46                                       | 47                                          | 52                                   | 46                                      | 52                                |
| Thlaspi arvense (Thlaspidaceae) TaTFP       | 73                                 | 94                                      |                                       | 72                           | 72                                | 72                                   | 73                                    | 73                                    | 70                                          | 70                                      | 67                                   | 65                                     | 75                                | 52                                    | 52                                       | 63                                       | 51                                       | 50                                       | 46                                       | 46                                          | 51                                   | 47                                      | 52                                |
| Draba aurea (Arabideae) ESP1                | 75                                 | 80                                      | 79                                    |                              | 98                                | 79                                   | 76                                    | 78                                    | 78                                          | 79                                      | 74                                   | 72                                     | 81                                | 57                                    | 57                                       | 57                                       | 56                                       | 55                                       | 47                                       | 49                                          | 55                                   | 48                                      | 55                                |
| Draba lanceolata (Arabideae) ESP1           | 75                                 | 80                                      | 80                                    | 98                           |                                   | 80                                   | 76                                    | 78                                    | 78                                          | 78                                      | 74                                   | 72                                     | 81                                | 58                                    | 56                                       | 57                                       | 56                                       | 55                                       | 47                                       | 48                                          | 54                                   | 48                                      | 55                                |
| Brassica oleracea (Brassicaceae) ESP        | 74                                 | 80                                      | 79                                    | 81                           | 81                                |                                      | 85                                    | 89                                    | 76                                          | 77                                      | 73                                   | 71                                     | 89                                | 56                                    | 55                                       | 57                                       | 54                                       | 53                                       | 48                                       | 47                                          | 53                                   | 48                                      | 54                                |
| Brassica rapa (Brassicaceae) FJ374638       | 76                                 | 82                                      | 81                                    | 80                           | 80                                | 87                                   |                                       | 85                                    | 77                                          | 76                                      | 75                                   | 72                                     | 84                                | 53                                    | 55                                       | 54                                       | 53                                       | 53                                       | 47                                       | 48                                          | 53                                   | 47                                      | 53                                |
| Schouwia purpurea (Brassicaceae) ESP1       | 77                                 | 82                                      | 82                                    | 82                           | 82                                | 88                                   | 87                                    |                                       | 76                                          | 78                                      | 73                                   | 71                                     | 86                                | 56                                    | 57                                       | 56                                       | 55                                       | 54                                       | 46                                       | 49                                          | 54                                   | 48                                      | 55                                |
| Arabidopsis lyrata (Camelineae) XM002884120 | 78                                 | 78                                      | 78                                    | 80                           | 80                                | 79                                   | 81                                    | 81                                    |                                             | 83                                      | 78                                   | 76                                     | 79                                | 57                                    | 55                                       | 57                                       | 54                                       | 53                                       | 47                                       | 46                                          | 53                                   | 49                                      | 55                                |
| Arabidopsis thaliana (Camelineae) AtESP     | 78                                 | 79                                      | 78                                    | 81                           | 81                                | 80                                   | 81                                    | 81                                    | 85                                          |                                         | 78                                   | 76                                     | 78                                | 56                                    | 56                                       | 56                                       | 55                                       | 54                                       | 50                                       | 48                                          | 53                                   | 51                                      | 54                                |
| Cardamine hirsuta (Cardamineae) ESP1        | 77                                 | 77                                      | 76                                    | 79                           | 79                                | 79                                   | 80                                    | 80                                    | 83                                          | 82                                      |                                      | 85                                     | 76                                | 54                                    | 52                                       | 53                                       | 51                                       | 50                                       | 48                                       | 47                                          | 51                                   | 48                                      | 51                                |
| Cardamine impatiens (Cardamineae) ESP1      | 74                                 | 77                                      | 76                                    | 78                           | 79                                | 78                                   | 79                                    | 80                                    | 83                                          | 83                                      | 89                                   |                                        | 73                                | 54                                    | 53                                       | 54                                       | 51                                       | 51                                       | 48                                       | 47                                          | 51                                   | 49                                      | 52                                |
| Isatis tinctoria (Isatideae) ESP1           | 75                                 | 83                                      | 83                                    | 84                           | 84                                | 88                                   | 87                                    | 88                                    | 81                                          | 82                                      | 80                                   | 81                                     |                                   | 58                                    | 57                                       | 60                                       | 57                                       | 55                                       | 48                                       | 48                                          | 55                                   | 49                                      | 57                                |
| Schouwia purpurea (Brassicaceae) NSP1       | 67                                 | 65                                      | 64                                    | 68                           | 69                                | 66                                   | 65                                    | 68                                    | 68                                          | 65                                      | 67                                   | 66                                     | 65                                |                                       | 80                                       | 80                                       | 79                                       | 77                                       | 53                                       | 52                                          | 81                                   | 54                                      | 83                                |
| Arabidopsis thaliana (Camelineae) AtNSP1    | 67                                 | 63                                      | 63                                    | 67                           | 67                                | 66                                   | 64                                    | 67                                    | 66                                          | 66                                      | 64                                   | 64                                     | 66                                | 85                                    |                                          | 81                                       | 90                                       | 92                                       | 53                                       | 51                                          | 84                                   | 53                                      | 77                                |
| Arabidopsis thaliana (Camelineae) AtNSP2    | 64                                 | 66                                      | 66                                    | 68                           | 68                                | 64                                   | 66                                    | 66                                    | 67                                          | 66                                      | 65                                   | 64                                     | 65                                | 85                                    | 86                                       |                                          | 79                                       | 79                                       | 52                                       | 52                                          | 82                                   | 54                                      | 75                                |
| Arabidopsis thaliana (Camelineae) AtNSP3    | 68                                 | 63                                      | 64                                    | 66                           | 67                                | 63                                   | 64                                    | 65                                    | 67                                          | 67                                      | 64                                   | 63                                     | 65                                | 83                                    | 92                                       | 85                                       |                                          | 85                                       | 50                                       | 49                                          | 81                                   | 52                                      | 74                                |
| Arabidopsis thaliana (Camelineae) AtNSP4    | 67                                 | 64                                      | 64                                    | 67                           | 68                                | 68                                   | 66                                    | 66                                    | 67                                          | 67                                      | 65                                   | 65                                     | 67                                | 83                                    | 95                                       | 85                                       | 90                                       |                                          | 52                                       | 50                                          | 81                                   | 52                                      | 74                                |
| Arabidopsis thaliana (Camelineae) AtNSP5    | 63                                 | 63                                      | 63                                    | 66                           | 65                                | 64                                   | 63                                    | 61                                    | 64                                          | 64                                      | 64                                   | 61                                     | 64                                | 67                                    | 67                                       | 68                                       | 66                                       | 67                                       |                                          | 54                                          | 51                                   | 85                                      | 52                                |
| Arabidopsis thaliana (Camelineae) At3g07720 | 62                                 | 62                                      | 63                                    | 61                           | 61                                | 64                                   | 62                                    | 65                                    | 63                                          | 64                                      | 65                                   | 64                                     | 62                                | 67                                    | 66                                       | 66                                       | 66                                       | 66                                       | 65                                       |                                             | 51                                   | 57                                      | 51                                |
| Cardamine hirsuta (Cardamineae) NSP1        | 65                                 | 63                                      | 62                                    | 67                           | 67                                | 65                                   | 65                                    | 65                                    | 68                                          | 67                                      | 65                                   | 64                                     | 66                                | 84                                    | 88                                       | 86                                       | 86                                       | 87                                       | 66                                       | 66                                          |                                      | 51                                      | 75                                |
| Eutrema halophilum (Eutremeae) AK353179     | 62                                 | 62                                      | 64                                    | 64                           | 65                                | 66                                   | 65                                    | 63                                    | 63                                          | 63                                      | 65                                   | 61                                     | 62                                | 68                                    | 67                                       | 68                                       | 67                                       | 70                                       | 84                                       | 65                                          | 66                                   |                                         | 53                                |
| Isatis tinctoria (Isatideae) NSP1           | 65                                 | 65                                      | 64                                    | 67                           | 66                                | 66                                   | 65                                    | 67                                    | 67                                          | 67                                      | 65                                   | 65                                     | 65                                | 87                                    | 83                                       | 82                                       | 82                                       | 82                                       | 67                                       | 67                                          | 83                                   | 68                                      |                                   |
