# Supplementary material for: Evolution of specifier proteins in glucosinolate-containing plants
Source: PubMed Central journal article supplement (PMC3482593; doi:10.1186/1471-2148-12-127), 2012-07-28
Supplement: 1471-2148-12-127-S10.pdf [file 1471-2148-12-127-S10.pdf]

**Tab. S4: Amino acid and nucleotide distances of specifier proteins.** Amino acid distances are shown on the right, nucleotide distances on the left as determined by MEGA Vers. 5.05 using the Equal-input +G model ( $d_{aa}$ ) and the Kimura-Two-Parameter model +G +I ( $d_{na}$ ). Alignment gaps (e.g. JAL domains that are present only in NSPs) are regarded as non-informative positions in this analysis.

|                                             | Lepidium sativum (Lepidieae) LsTFP | Alliaria petiolata (Thlaspidaceae) TFP1 | Thlaspi arvense (Thlaspidaceae) TaTFP | Draba aurea (Arabideae) ESP1 | Draba lanceolata (Arabideae) ESP1 | Brassica oleraceae (Brassicaceae) ESP | Brassica rapa (Brassicaceae) FJ374638 | Schouwia purpurea (Brassicaceae) ESP1 | Arabidopsis lyrata (Camelineae) XM002884120 | Arabidopsis thaliana (Camelineae) AtESP | Cardamine hirsuta (Cardamineae) ESP1 | Cardamine impatiens (Cardamineae) ESP1 | Isatis tinctoria (Isatideae) ESP1 | Schouwia purpurea (Brassicaceae) NSP1 | Arabidopsis thaliana (Camelineae) AtNSP1 | Arabidopsis thaliana (Camelineae) AtNSP2 | Arabidopsis thaliana (Camelineae) AtNSP3 | Arabidopsis thaliana (Camelineae) AtNSP4 | Arabidopsis thaliana (Camelineae) AtNSP5 | Arabidopsis thaliana (Camelineae) At3g07720 | Cardamine hirsuta (Cardamineae) NSP1 | Eutrema halophilum (Eutremeae) AK353179 | Isatis tinctoria (Isatideae) NSP1 |
|---------------------------------------------|------------------------------------|-----------------------------------------|---------------------------------------|------------------------------|-----------------------------------|---------------------------------------|---------------------------------------|---------------------------------------|---------------------------------------------|-----------------------------------------|--------------------------------------|----------------------------------------|-----------------------------------|---------------------------------------|------------------------------------------|------------------------------------------|------------------------------------------|------------------------------------------|------------------------------------------|---------------------------------------------|--------------------------------------|-----------------------------------------|-----------------------------------|
| Lepidium sativum (Lepidieae) LsTFP          |                                    | 0,681                                   | 0,701                                 | 0,503                        | 0,495                             | 0,605                                 | 0,578                                 | 0,561                                 | 0,497                                       | 0,479                                   | 0,560                                | 0,605                                  | 0,587                             | 1,010                                 | 1,024                                    | 1,071                                    | 0,985                                    | 1,151                                    | 1,461                                    | 1,461                                       | 1,102                                | 1,508                                   | 1,136                             |
| Alliaria petiolata (Thlaspidaceae) TFP1     | 0,531                              |                                         | 0,065                                 | 0,335                        | 0,341                             | 0,323                                 | 0,317                                 | 0,299                                 | 0,374                                       | 0,373                                   | 0,434                                | 0,495                                  | 0,282                             | 0,812                                 | 0,813                                    | 0,790                                    | 0,815                                    | 0,926                                    | 1,336                                    | 1,316                                       | 0,861                                | 1,399                                   | 0,838                             |
| Thlaspi arvense (Thlaspidaceae) TaTFP       | 0,545                              | 0,059                                   |                                       | 0,347                        | 0,354                             | 0,366                                 | 0,341                                 | 0,341                                 | 0,408                                       | 0,406                                   | 0,464                                | 0,527                                  | 0,299                             | 0,836                                 | 0,848                                    | 0,824                                    | 0,839                                    | 0,952                                    | 1,335                                    | 1,396                                       | 0,873                                | 1,317                                   | 0,862                             |
| Draba aurea (Arabideae) ESP1                | 0,419                              | 0,290                                   | 0,303                                 |                              | 0,010                             | 0,250                                 | 0,294                                 | 0,266                                 | 0,272                                       | 0,266                                   | 0,348                                | 0,393                                  | 0,219                             | 0,713                                 | 0,693                                    | 0,693                                    | 0,704                                    | 0,756                                    | 1,262                                    | 1,172                                       | 0,757                                | 1,264                                   | 0,815                             |
| Draba lanceolata (Arabideae) ESP1           | 0,416                              | 0,292                                   | 0,305                                 | 0,008                        |                                   | 0,244                                 | 0,294                                 | 0,266                                 | 0,267                                       | 0,266                                   | 0,335                                | 0,380                                  | 0,219                             | 0,703                                 | 0,713                                    | 0,693                                    | 0,694                                    | 0,779                                    | 1,243                                    | 1,207                                       | 0,779                                | 1,263                                   | 0,815                             |
| Brassica oleraceae (Brassicaceae) ESP       | 0,445                              | 0,274                                   | 0,291                                 | 0,271                        | 0,270                             |                                       | 0,185                                 | 0,111                                 | 0,312                                       | 0,294                                   | 0,354                                | 0,414                                  | 0,123                             | 0,735                                 | 0,724                                    | 0,703                                    | 0,747                                    | 0,802                                    | 1,207                                    | 1,281                                       | 0,826                                | 1,282                                   | 0,827                             |
| Brassica rapa (Brassicaceae) FJ374638       | 0,439                              | 0,234                                   | 0,252                                 | 0,275                        | 0,274                             | 0,169                                 |                                       | 0,166                                 | 0,295                                       | 0,299                                   | 0,311                                | 0,380                                  | 0,180                             | 0,825                                 | 0,734                                    | 0,790                                    | 0,780                                    | 0,813                                    | 1,242                                    | 1,171                                       | 0,813                                | 1,359                                   | 0,876                             |
| Schouwia purpurea (Brassicaceae) ESP1       | 0,400                              | 0,232                                   | 0,242                                 | 0,234                        | 0,229                             | 0,124                                 | 0,155                                 |                                       | 0,312                                       | 0,271                                   | 0,354                                | 0,407                                  | 0,153                             | 0,745                                 | 0,682                                    | 0,703                                    | 0,725                                    | 0,768                                    | 1,319                                    | 1,138                                       | 0,779                                | 1,301                                   | 0,791                             |
| Arabidopsis lyrata (Camelineae) XM002884120 | 0,353                              | 0,302                                   | 0,332                                 | 0,268                        | 0,262                             | 0,295                                 | 0,254                                 | 0,254                                 |                                             | 0,200                                   | 0,278                                | 0,312                                  | 0,245                             | 0,749                                 | 0,818                                    | 0,717                                    | 0,808                                    | 0,905                                    | 1,232                                    | 1,347                                       | 0,867                                | 1,215                                   | 0,831                             |
| Arabidopsis thaliana (Camelineae) AtESP     | 0,345                              | 0,309                                   | 0,333                                 | 0,246                        | 0,245                             | 0,279                                 | 0,258                                 | 0,234                                 | 0,184                                       |                                         | 0,282                                | 0,311                                  | 0,266                             | 0,790                                 | 0,779                                    | 0,756                                    | 0,781                                    | 0,850                                    | 1,073                                    | 1,206                                       | 0,850                                | 1,090                                   | 0,814                             |
| Cardamine hirsuta (Cardamineae) ESP1        | 0,396                              | 0,360                                   | 0,381                                 | 0,299                        | 0,295                             | 0,293                                 | 0,271                                 | 0,256                                 | 0,219                                       | 0,248                                   |                                      | 0,162                                  | 0,299                             | 0,824                                 | 0,900                                    | 0,862                                    | 0,890                                    | 0,981                                    | 1,187                                    | 1,278                                       | 0,940                                | 1,242                                   | 0,941                             |
| Cardamine impatiens (Cardamineae) ESP1      | 0,408                              | 0,357                                   | 0,389                                 | 0,303                        | 0,299                             | 0,319                                 | 0,285                                 | 0,255                                 | 0,216                                       | 0,213                                   | 0,125                                |                                        | 0,354                             | 0,837                                 | 0,887                                    | 0,850                                    | 0,904                                    | 0,982                                    | 1,188                                    | 1,260                                       | 0,954                                | 1,190                                   | 0,955                             |
| Isatis tinctoria (Isatideae) ESP1           | 0,411                              | 0,196                                   | 0,222                                 | 0,213                        | 0,211                             | 0,132                                 | 0,141                                 | 0,120                                 | 0,230                                       | 0,228                                   | 0,257                                | 0,248                                  |                                   | 0,662                                 | 0,662                                    | 0,605                                    | 0,663                                    | 0,745                                    | 1,206                                    | 1,206                                       | 0,713                                | 1,244                                   | 0,724                             |
| Schouwia purpurea (Brassicaceae) NSP1       | 0,875                              | 0,734                                   | 0,764                                 | 0,665                        | 0,651                             | 0,697                                 | 0,730                                 | 0,637                                 | 0,702                                       | 0,749                                   | 0,686                                | 0,787                                  | 0,676                             |                                       | 0,185                                    | 0,157                                    | 0,201                                    | 0,234                                    | 0,955                                    | 0,983                                       | 0,153                                | 0,956                                   | 0,153                             |
| Arabidopsis thaliana (Camelineae) AtNSP1    | 0,853                              | 0,772                                   | 0,796                                 | 0,653                        | 0,653                             | 0,711                                 | 0,696                                 | 0,656                                 | 0,730                                       | 0,761                                   | 0,690                                | 0,812                                  | 0,659                             | 0,166                                 |                                          | 0,194                                    | 0,100                                    | 0,057                                    | 0,983                                    | 1,012                                       | 0,162                                | 0,984                                   | 0,229                             |
| Arabidopsis thaliana (Camelineae) AtNSP2    | 0,957                              | 0,707                                   | 0,730                                 | 0,666                        | 0,673                             | 0,741                                 | 0,699                                 | 0,679                                 | 0,744                                       | 0,744                                   | 0,711                                | 0,807                                  | 0,690                             | 0,157                                 | 0,145                                    |                                          | 0,232                                    | 0,229                                    | 1,012                                    | 0,969                                       | 0,180                                | 0,956                                   | 0,239                             |
| Arabidopsis thaliana (Camelineae) AtNSP3    | 0,888                              | 0,729                                   | 0,752                                 | 0,662                        | 0,657                             | 0,762                                 | 0,733                                 | 0,692                                 | 0,717                                       | 0,772                                   | 0,709                                | 0,825                                  | 0,664                             | 0,181                                 | 0,085                                    | 0,160                                    |                                          | 0,155                                    | 1,047                                    | 1,095                                       | 0,216                                | 1,033                                   | 0,286                             |
| Arabidopsis thaliana (Camelineae) AtNSP4    | 0,889                              | 0,800                                   | 0,840                                 | 0,667                        | 0,667                             | 0,739                                 | 0,730                                 | 0,687                                 | 0,769                                       | 0,788                                   | 0,727                                | 0,849                                  | 0,683                             | 0,191                                 | 0,041                                    | 0,155                                    | 0,108                                    |                                          | 1,026                                    | 1,104                                       | 0,214                                | 1,012                                   | 0,271                             |
| Arabidopsis thaliana (Camelineae) AtNSP5    | 1,159                              | 1,189                                   | 1,168                                 | 0,971                        | 0,994                             | 1,045                                 | 1,044                                 | 1,061                                 | 1,040                                       | 1,034                                   | 1,054                                | 1,153                                  | 1,023                             | 0,886                                 | 0,818                                    | 0,827                                    | 0,893                                    | 0,838                                    |                                          | 0,928                                       | 1,073                                | 0,149                                   | 0,998                             |
| Arabidopsis thaliana (Camelineae) At3g07720 | 1,211                              | 1,230                                   | 1,205                                 | 0,971                        | 0,996                             | 1,018                                 | 1,046                                 | 0,943                                 | 0,982                                       | 1,090                                   | 1,061                                | 1,086                                  | 1,083                             | 0,815                                 | 0,800                                    | 0,783                                    | 0,844                                    | 0,845                                    | 0,872                                    |                                             | 1,012                                | 0,827                                   | 1,028                             |
| Cardamine hirsuta (Cardamineae) NSP1        | 0,935                              | 0,757                                   | 0,790                                 | 0,662                        | 0,665                             | 0,760                                 | 0,729                                 | 0,703                                 | 0,725                                       | 0,760                                   | 0,751                                | 0,890                                  | 0,687                             | 0,177                                 | 0,127                                    | 0,154                                    | 0,155                                    | 0,140                                    | 0,828                                    | 0,820                                       |                                      | 1,074                                   | 0,229                             |
| Eutrema halophilum (Eutremeae) AK353179     | 1,238                              | 1,178                                   | 1,096                                 | 1,040                        | 1,033                             | 1,066                                 | 1,081                                 | 1,076                                 | 1,039                                       | 1,077                                   | 1,031                                | 1,126                                  | 1,078                             | 0,864                                 | 0,864                                    | 0,794                                    | 0,894                                    | 0,920                                    | 0,215                                    | 0,853                                       | 0,852                                |                                         | 0,971                             |
| Isatis tinctoria (Isatideae) NSP1           | 1,014                              | 0,748                                   | 0,767                                 | 0,728                        | 0,740                             | 0,733                                 | 0,768                                 | 0,692                                 | 0,744                                       | 0,786                                   | 0,743                                | 0,848                                  | 0,708                             | 0,138                                 | 0,188                                    | 0,205                                    | 0,212                                    | 0,211                                    | 0,901                                    | 0,812                                       | 0,193                                | 0,891                                   |                                   |
