# Supplementary material for: Evolution of specifier proteins in glucosinolate-containing plants
Source: PubMed Central journal article supplement (PMC3482593; doi:10.1186/1471-2148-12-127), 2012-07-28
Supplement: 1471-2148-12-127-S11.pdf [file 1471-2148-12-127-S11.pdf]

**Tab. S5: Non-synonymous vs. synonymous substitution rate ratios of specifier protein cDNAs.**  $d_N$  and  $d_S$  were calculated by MEGA 5.05 from pairwise comparisons based on the Kimura-2-parameter model and used to determine  $\omega$  as the  $d_N / d_S$  ratio.

|                                             | Lepidium sativum (Lepidieae) LsTFP | Alliaria petiolata (Thlaspeidae) TFP1 | Thlaspi arvense (Thlaspeidae) TaTFP | Draba aurea (Arabideae) ESP1 | Draba lanceolata (Arabideae) ESP1 | Brassica oleraceae (Brassicaceae) ESP | Brassica rapa (Brassicaceae) FJ374638 | Schouwia purpurea (Brassicaceae) ESP1 | Arabidopsis lyrata (Camelineae) XM002884120 | Arabidopsis thaliana (Camelineae) AtESP | Cardamine hirsuta (Cardamineae) ESP1 | Cardamine impatiens (Cardamineae) ESP1 | Isatis tinctoria (Isatideae) ESP1 | Schouwia purpurea (Brassicaceae) NSP1 | Arabidopsis thaliana (Camelineae) AtNSP1 | Arabidopsis thaliana (Camelineae) AtNSP2 | Arabidopsis thaliana (Camelineae) AtNSP3 | Arabidopsis thaliana (Camelineae) AtNSP4 | Arabidopsis thaliana (Camelineae) AtNSP5 | Arabidopsis thaliana (Camelineae) At3g07720 | Cardamine hirsuta (Cardamineae) NSP1 | Eutrema halophilum (Eutremeae) AK353179 |
|---------------------------------------------|------------------------------------|---------------------------------------|-------------------------------------|------------------------------|-----------------------------------|---------------------------------------|---------------------------------------|---------------------------------------|---------------------------------------------|-----------------------------------------|--------------------------------------|----------------------------------------|-----------------------------------|---------------------------------------|------------------------------------------|------------------------------------------|------------------------------------------|------------------------------------------|------------------------------------------|---------------------------------------------|--------------------------------------|-----------------------------------------|
| Alliaria petiolata (Thlaspeidae) TFP1       | 0,516                              |                                       |                                     |                              |                                   |                                       |                                       |                                       |                                             |                                         |                                      |                                        |                                   |                                       |                                          |                                          |                                          |                                          |                                          |                                             |                                      |                                         |
| Thlaspi arvense (Thlaspeidae) TaTFP         | 0,524                              | 0,198                                 |                                     |                              |                                   |                                       |                                       |                                       |                                             |                                         |                                      |                                        |                                   |                                       |                                          |                                          |                                          |                                          |                                          |                                             |                                      |                                         |
| Draba aurea (Arabideae) ESP1                | 0,380                              | 0,348                                 | 0,344                               |                              |                                   |                                       |                                       |                                       |                                             |                                         |                                      |                                        |                                   |                                       |                                          |                                          |                                          |                                          |                                          |                                             |                                      |                                         |
| Draba lanceolata (Arabideae) ESP1           | 0,385                              | 0,352                                 | 0,352                               | 0,627                        |                                   |                                       |                                       |                                       |                                             |                                         |                                      |                                        |                                   |                                       |                                          |                                          |                                          |                                          |                                          |                                             |                                      |                                         |
| Brassica oleraceae (Brassicaceae) ESP       | 0,397                              | 0,359                                 | 0,392                               | 0,218                        | 0,214                             |                                       |                                       |                                       |                                             |                                         |                                      |                                        |                                   |                                       |                                          |                                          |                                          |                                          |                                          |                                             |                                      |                                         |
| Brassica rapa (Brassicaceae) FJ374638       | 0,412                              | 0,403                                 | 0,381                               | 0,277                        | 0,265                             | 0,213                                 |                                       |                                       |                                             |                                         |                                      |                                        |                                   |                                       |                                          |                                          |                                          |                                          |                                          |                                             |                                      |                                         |
| Schouwia purpurea (Brassicaceae) ESP1       | 0,460                              | 0,446                                 | 0,478                               | 0,285                        | 0,293                             | 0,198                                 | 0,222                                 |                                       |                                             |                                         |                                      |                                        |                                   |                                       |                                          |                                          |                                          |                                          |                                          |                                             |                                      |                                         |
| Arabidopsis lyrata (Camelineae) XM002884120 | 0,427                              | 0,444                                 | 0,415                               | 0,279                        | 0,285                             | 0,304                                 | 0,339                                 | 0,360                                 |                                             |                                         |                                      |                                        |                                   |                                       |                                          |                                          |                                          |                                          |                                          |                                             |                                      |                                         |
| Arabidopsis thaliana (Camelineae) AtESP     | 0,449                              | 0,383                                 | 0,377                               | 0,287                        | 0,297                             | 0,265                                 | 0,305                                 | 0,285                                 | 0,258                                       |                                         |                                      |                                        |                                   |                                       |                                          |                                          |                                          |                                          |                                          |                                             |                                      |                                         |
| Cardamine hirsuta (Cardamineae) ESP1        | 0,405                              | 0,428                                 | 0,417                               | 0,379                        | 0,364                             | 0,321                                 | 0,281                                 | 0,388                                 | 0,322                                       | 0,325                                   |                                      |                                        |                                   |                                       |                                          |                                          |                                          |                                          |                                          |                                             |                                      |                                         |
| Cardamine impatiens (Cardamineae) ESP1      | 0,495                              | 0,549                                 | 0,511                               | 0,478                        | 0,475                             | 0,381                                 | 0,416                                 | 0,549                                 | 0,434                                       | 0,478                                   | 0,394                                |                                        |                                   |                                       |                                          |                                          |                                          |                                          |                                          |                                             |                                      |                                         |
| Isatis tinctoria (Isatideae) ESP1           | 0,448                              | 0,502                                 | 0,439                               | 0,273                        | 0,269                             | 0,143                                 | 0,265                                 | 0,287                                 | 0,331                                       | 0,327                                   | 0,341                                | 0,522                                  |                                   |                                       |                                          |                                          |                                          |                                          |                                          |                                             |                                      |                                         |
| Schouwia purpurea (Brassicaceae) NSP1       | 0,312                              | 0,312                                 | 0,333                               | 0,240                        | 0,241                             | 0,250                                 | 0,276                                 | 0,299                                 | 0,264                                       | 0,244                                   | 0,278                                | 0,253                                  | 0,236                             |                                       |                                          |                                          |                                          |                                          |                                          |                                             |                                      |                                         |
| Arabidopsis thaliana (Camelineae) AtNSP1    | 0,309                              | 0,306                                 | 0,308                               | 0,248                        | 0,254                             | 0,233                                 | 0,280                                 | 0,262                                 | 0,277                                       | 0,242                                   | 0,294                                | 0,260                                  | 0,253                             | 0,300                                 |                                          |                                          |                                          |                                          |                                          |                                             |                                      |                                         |
| Arabidopsis thaliana (Camelineae) AtNSP2    | 0,251                              | 0,320                                 | 0,342                               | 0,262                        | 0,254                             | 0,225                                 | 0,271                                 | 0,245                                 | 0,236                                       | 0,238                                   | 0,293                                | 0,251                                  | 0,219                             | 0,288                                 | 0,356                                    |                                          |                                          |                                          |                                          |                                             |                                      |                                         |
| Arabidopsis thaliana (Camelineae) AtNSP3    | 0,295                              | 0,342                                 | 0,346                               | 0,250                        | 0,249                             | 0,236                                 | 0,281                                 | 0,277                                 | 0,294                                       | 0,250                                   | 0,302                                | 0,285                                  | 0,278                             | 0,291                                 | 0,308                                    | 0,351                                    |                                          |                                          |                                          |                                             |                                      |                                         |
| Arabidopsis thaliana (Camelineae) AtNSP4    | 0,335                              | 0,321                                 | 0,323                               | 0,255                        | 0,261                             | 0,253                                 | 0,289                                 | 0,282                                 | 0,282                                       | 0,246                                   | 0,307                                | 0,279                                  | 0,270                             | 0,316                                 | 0,319                                    | 0,349                                    | 0,418                                    |                                          |                                          |                                             |                                      |                                         |
| Arabidopsis thaliana (Camelineae) AtNSP5    | 0,312                              | 0,250                                 | 0,238                               | 0,328                        | 0,326                             | 0,272                                 | 0,252                                 | 0,297                                 | 0,269                                       | 0,222                                   | 0,272                                | 0,262                                  | 0,292                             | 0,239                                 | 0,300                                    | 0,289                                    | 0,307                                    | 0,296                                    |                                          |                                             |                                      |                                         |
| Arabidopsis thaliana (Camelineae) At3g07720 | 0,244                              | 0,234                                 | 0,288                               | 0,223                        | 0,240                             | 0,316                                 | 0,275                                 | 0,302                                 | 0,351                                       | 0,239                                   | 0,311                                | 0,269                                  | 0,236                             | 0,306                                 | 0,303                                    | 0,295                                    | 0,323                                    | 0,308                                    | 0,270                                    |                                             |                                      |                                         |
| Cardamine hirsuta (Cardamineae) NSP1        | 0,302                              | 0,328                                 | 0,335                               | 0,259                        | 0,264                             | 0,256                                 | 0,298                                 | 0,271                                 | 0,303                                       | 0,264                                   | 0,316                                | 0,270                                  | 0,251                             | 0,259                                 | 0,343                                    | 0,344                                    | 0,429                                    | 0,435                                    | 0,322                                    | 0,330                                       |                                      |                                         |
| Eutrema halophilum (Eutremeae) AK353179     | 0,269                              | 0,287                                 | 0,278                               | 0,276                        | 0,285                             | 0,290                                 | 0,270                                 | 0,296                                 | 0,281                                       | 0,225                                   | 0,315                                | 0,263                                  | 0,273                             | 0,294                                 | 0,269                                    | 0,300                                    | 0,305                                    | 0,255                                    | 0,123                                    | 0,256                                       | 0,319                                |                                         |
| Isatis tinctoria (Isatideae) NSP1           | 0,281                              | 0,306                                 | 0,332                               | 0,255                        | 0,246                             | 0,281                                 | 0,296                                 | 0,292                                 | 0,271                                       | 0,231                                   | 0,312                                | 0,279                                  | 0,266                             | 0,360                                 | 0,324                                    | 0,348                                    | 0,383                                    | 0,357                                    | 0,277                                    | 0,298                                       | 0,372                                | 0,302                                   |
