# Supplementary material for: Evolution of specifier proteins in glucosinolate-containing plants
Source: PubMed Central journal article supplement (PMC3482593; doi:10.1186/1471-2148-12-127), 2012-07-28
Supplement: 1471-2148-12-127-S12.pdf [file 1471-2148-12-127-S12.pdf]

**Tab. S6: Sources of seeds for growing plants for phytochemical analysis and cDNA isolation.**

| <b>Species</b>                 | <b>Source</b>                                                        |
|--------------------------------|----------------------------------------------------------------------|
| <i>Alliaria petiolata</i>      | Collected locally (Lahstedt, Germany)                                |
| <i>Alyssum alpestre</i>        | Österr. Gartenbaugesellschaft Graz                                   |
| <i>Arabis glabra</i>           | Botanical Garden & Rhododendron Parc Bremen, Germany                 |
| <i>Barbarea intermedia</i>     | Botanical Garden & Rhododendron Parc Bremen, Germany                 |
| <i>Barbarea stricta</i>        | Botanical Garden & Rhododendron Parc Bremen, Germany                 |
| <i>Barbarea vulgaris</i>       | Botanical Garden & Rhododendron Parc Bremen, Germany                 |
| <i>Camelina microcarpa</i>     | Botanical Garden & Rhododendron Parc Bremen, Germany                 |
| <i>Capsella bursa-pastoris</i> | Medicinal Plant Garden, Technische Universität Braunschweig, Germany |
| <i>Capsella rubella</i>        | Markus Piotrowski, Ruhr-Universität Bochum, Germany                  |
| <i>Cardamine hirsuta</i>       | Botanical Garden & Rhododendron Parc Bremen, Germany                 |
| <i>Cardamine impatiens</i>     | Botanical Garden Tübingen, Germany                                   |
| <i>Cleome hassleriana</i>      | Universität Hohenheim/Stuttgart                                      |
| <i>Cleome spinosa</i>          | Private garden (J.C. Kuchernig, Lahstedt, Germany)                   |
| <i>Diplotaxis muralis</i>      | Botanical Garden & Rhododendron Parc Bremen, Germany                 |
| <i>Draba aurea</i>             | Botanical Garden Bonn, Germany                                       |
| <i>Draba lanceolata</i>        | Botanical Garden Bonn, Germany                                       |
| <i>Draba muralis</i>           | Botanical Garden & Rhododendron Parc Bremen, Germany                 |
| <i>Eruca sativa</i>            | Medicinal Plant Garden, Technische Universität Braunschweig, Germany |
| <i>Erysimum cheiri</i>         | Botanical Garden Caen, France                                        |
| <i>Erysimum hieraciifolium</i> | Botanical Garden & Rhododendron Parc Bremen, Germany                 |
| <i>Iberis amara</i>            | Botanical Garden Krefeld, Germany                                    |
| <i>Isatis tinctoria</i>        | Medicinal Plant Garden, Technische Universität Braunschweig, Germany |
| <i>Limnanthes douglasii</i>    | Botanical Garden Bonn, Germany                                       |
| <i>Moringa oleifera</i>        | Botanical Garden Nemmara-Palakkad, India                             |
| <i>Reseda lutea</i>            | Botanical Garden Krefeld, Germany                                    |
| <i>Reseda luteola</i>          | Botanical Garden & Rhododendron Parc Bremen, Germany                 |
| <i>Schouwia purpurea</i>       | Medicinal Plant Garden, Technische Universität Braunschweig, Germany |
| <i>Tropaeolum minus</i>        | Botanical Garden Gießen, Germany                                     |
